# Supplementary material
Source: PubMed Central journal article supplement (PMC2966098)
Supplement: supp_M110.152868_jbc.M110.152868-2.pdf [file supp_M110.152868_jbc.M110.152868-2.pdf]

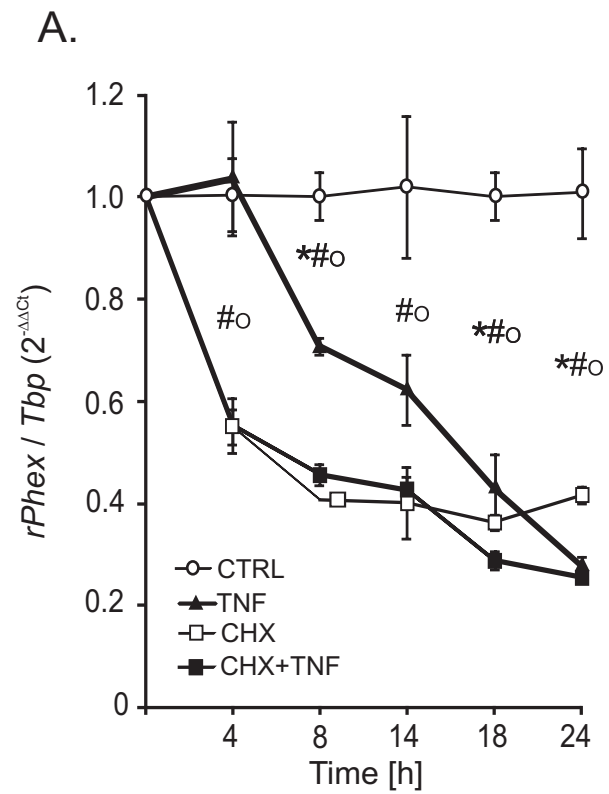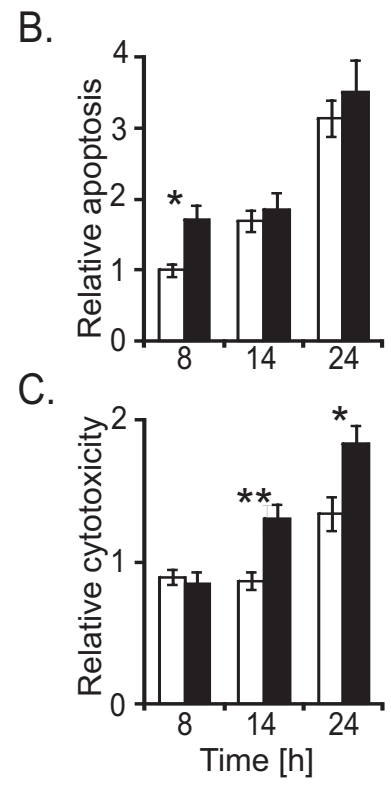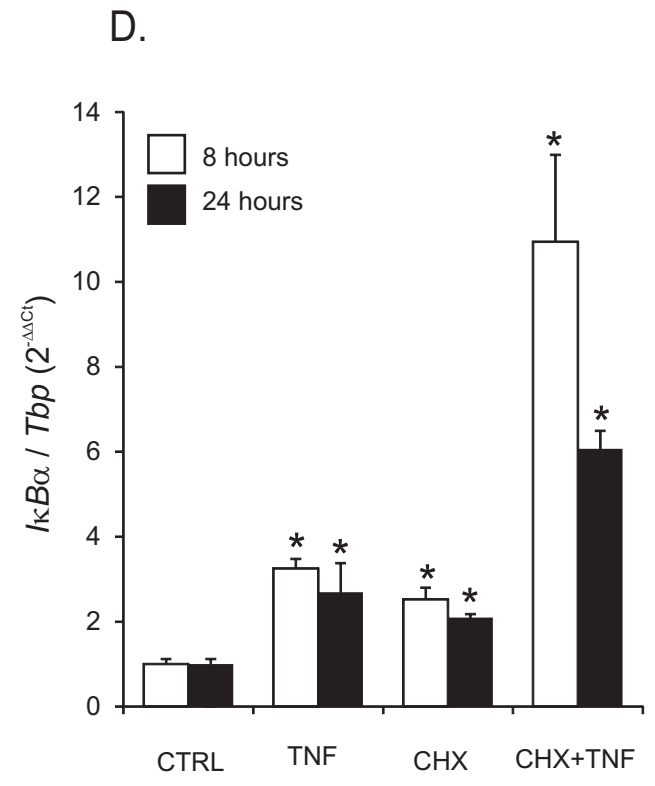

Suppl. Figure 1.

## Supplemental Figure 2

- A. IPI00231678 (100%), 112,664.0 Da**  
**Poly [ADP-ribose] polymerase 1**  
**13 unique peptides, 15 unique spectra, 15 total spectra, 197/1014 amino acids (19% coverage)**

```

MAEATERLYR V EYAKSGRAS CKKCSSEIPK DSLRMAIMVQ SPMFDGKVP
WYHFS CFWKV GHSIRQPDTE V DGFSEL RWD DQ QKVKKTAE AGGVAGKGQH
GGGGKA EKT L GDFAAEYAKS NRSTCKG CME KIEKGQMR L S KKMLDPEK PQ
LGMIDRWYHP TCFVKNRDEL GFRPEYSASQ LKGFSLLSAE DKEALKKQLP
AVKSEGRK KC DEVDGIDEVA KKKSKK GKDK ESSKLEKALK AQNELVWN I K
DELKKACSTN DLKELLIFNQ QQVPSGESAI LDRVADGMAF GALLPCKECS
GQLVFKSDAY YCTGDVTAWT KCMVKTQNP S RKEWVTPKEF REISY LKKL K
IKKQDR L FPP ESSAPAPPAP PVSITSAPTA VNSSAPADKP LSNMKILT LG
KLSQNKDEAK AMIEKLG GKL TGSANKASLC ISTKKEVEKM SKKMEEV KAA
NVRVVCEDFL QDVSASAKSL QELLSAHSLS SWGAEV KVEP GEVVVPK GKS
AAPS K KSKGA VKEEGV NKSE KRMK L TLKGG AAVDPDSGLE HSAHVLEKGG
K VFSATLGLV DIVKGTNSYY K LQLLESDKE SRYWIFRSWG RVGTVIGSNK
  
```

## B.

| Sequence                   | Identification probability | SEAQUEST XCorr score | SEAQUEST deltaCn score | X! Tandem log(e) score | NTT | Modifications identified by spectrum              | Observed m/z | Actual peptide mass | Charge | ΔAMU    | ΔPPM | Start | Stop |
|----------------------------|----------------------------|----------------------|------------------------|------------------------|-----|---------------------------------------------------|--------------|---------------------|--------|---------|------|-------|------|
| (K)VVDRDSEAEVIRK(Y)        | 95%                        | 3.65                 | 0.27                   |                        | 2   |                                                   | 549.21       | 1,644.60            | 3      | 0.75    | 450  | 803   | 816  |
| (K)LQLLESDKESR(Y)          | 95%                        | 2.85                 | 0.25                   |                        | 2   |                                                   | 659.58       | 1,317.15            | 2      | 0.45    | 340  | 572   | 582  |
| (K)VFSATLGLVDIVK(G)        | 95%                        | 3.43                 | 0.30                   | 2.60                   | 2   |                                                   | 681.50       | 1,360.98            | 2      | 0.19    | 140  | 552   | 564  |
| (R)TTNFAGILSQGLR(I)        | 95%                        | 4.44                 | 0.44                   | 4.64                   | 2   |                                                   | 689.49       | 1,376.96            | 2      | 0.22    | 160  | 866   | 878  |
| (R)KCCDEVDGIDEVAK(K)       | 95%                        | 3.32                 | 0.31                   | 1.68                   | 2   | Carbamidomethyl (+57)                             | 739.60       | 1,477.18            | 2      | 0.50    | 340  | 209   | 221  |
| (R)MAIMVQSPMFDGK(V)        | 95%                        | 2.87                 | 0.08                   | 2.40                   | 2   | Oxidation (+16), Oxidation (+16), Oxidation (+16) | 751.96       | 1,501.91            | 2      | 0.25    | 170  | 35    | 47   |
| (K)KPLLNTDSVQAK(V)         | 95%                        | 3.08                 | 0.27                   | 1.07                   | 2   |                                                   | 762.93       | 1,523.85            | 2      | 0.017   | 11   | 748   | 761  |
| (R)VVCEDFLQDVSASAK(S)      | 95%                        | 4.61                 | 0.42                   | 6.11                   | 2   | Carbamidomethyl (+57)                             | 834.62       | 1,667.22            | 2      | 0.44    | 260  | 454   | 468  |
| (R)GGSDDSSKDPIDVNYEK(L)    | 95%                        | 3.33                 | 0.28                   | 3.01                   | 2   |                                                   | 913.60       | 1,825.18            | 2      | 0.38    | 210  | 780   | 796  |
| (K)ALVEYIDLQKMP L GK(L)    | 95%                        | 2.99                 | 0.18                   | 3.38                   | 2   | Oxidation (+16)                                   | 932.25       | 1,862.48            | 2      | 0.49    | 260  | 685   | 700  |
| (K)GGAAVDPDSGLEHSAHVLEK(G) | 95%                        | 3.38                 | 0.42                   | 5.21                   | 2   |                                                   | 994.98       | 1,987.95            | 2      | -0.0080 | -4.0 | 529   | 548  |
| (K)VEMLDNLDDIEVAYSLLR(G)   | 95%                        | 3.22                 | 0.35                   | 3.16                   | 2   | Oxidation (+16)                                   | 1,061.54     | 2,121.06            | 2      | -0.043  | -20  | 762   | 779  |
| (K)ELLIFNQQVPSGESAILDR(V)  | 95%                        | 3.51                 | 0.20                   | 1.66                   | 2   |                                                   | 1,129.11     | 2,256.20            | 2      | 0.029   | 13   | 264   | 283  |
| (K)VFSATLGLVDIVK(G)        | 90%                        | 1.85                 | 0.06                   | 2.46                   | 2   |                                                   | 1,361.53     | 1,360.52            | 1      | -0.27   | -200 | 552   | 564  |
| (R)VVCEDFLQDVSASAK(S)      | 92%                        |                      |                        | 2.92                   | 2   | Carbamidomethyl (+57)                             | 1,667.38     | 1,666.38            | 1      | -0.41   | -250 | 454   | 468  |

C.

IPI00210090 (100%), 87,749.4 Da

SP120

5 unique peptides, 5 unique spectra, 5 total spectra, 95/798 amino acids (12% coverage)

```

MSSSPVNVKK LKVSELKEEL KKRRLSDKGL KADLMDR LQA ALDNEAGGRP
A M E P G N G S L D L G G D A A G R S G A G L E Q E A A A G A E D D E E E E G I S A L D G D Q M E L
G E E N G A A G A A D A G A M E E E E A A S E D E N G D D Q G F Q E G E D E L G D E E E G A G D E N
G H G E Q Q S Q P P A A A Q Q A S Q Q R G P G K E A A G K S S G P T S L F A V T V A P P G A R Q G Q
Q Q A G G D G K T E Q K A G D K K R G V K R P R E D H G R G Y F E Y I E E N K Y S R A K S P Q P P V
E E E D E H F D D T V V C L D T Y N C D L H F K I S R D R L S A S S L T M E S F A F L W A G G R A S
Y G V S K G K V C F E M K V T E K I P V R H L Y T K D I D I H E V R I G W S L T T S G M L L G E E E
F S Y G Y S L K G I K T C N C E T E D Y G E K F D E N D V I T C F A N F E T D E V E L S Y A K N G Q
D L G V A F K I S K E V L A D R P L F P H V L C H N C A V E F N F G Q K E K P Y F P I P E D C T F I
Q N V P L E D R V R G P K G P E E K K D C E V V M M I G L P G A G K T T W V T K H A A E N P G K Y N
I L G T N T I M D K M M V A G F K K Q M A D T G K L N T L L Q R A P Q C L G K F I E I A A R K K R N
F I L D Q T N V S A A A Q R R K M C L F A G F Q R K A V V V C P K D E D Y K Q R T Q K K A E V E G K

```

D.

| Sequence                                                       | Identification probability | SEAQUEST XCor score | SEAQUEST deltaCn score | X! Tandem log(e) score | NTT | Modifications identified by spectrum                    | Observed m/z | Actual peptide mass | Charge | ΔAMU  | ΔPPM | Start | Stop |
|----------------------------------------------------------------|----------------------------|---------------------|------------------------|------------------------|-----|---------------------------------------------------------|--------------|---------------------|--------|-------|------|-------|------|
| (K)KAEVEGKDLPEHAVLK(M)                                         | 95%                        | 3.78                | 0.28                   |                        | 2   |                                                         | 588.47       | 1,762.40            | 3      | 0.44  | 250  | 594   | 609  |
| (K)Q <sup>M</sup> ADTGKLNLLQR(A)                               | 95%                        | 2.41                | 0.29                   | 3.10                   | 2   | Oxidation (+16)                                         | 803.09       | 1,604.17            | 2      | 0.34  | 210  | 519   | 532  |
| (K)SSGPTSLFAVTVAPPGAR(Q)                                       | 95%                        | 2.57                | 0.27                   | 2.89                   | 2   |                                                         | 858.15       | 1,714.29            | 2      | 0.38  | 220  | 180   | 197  |
| (K)KDC <sup>E</sup> VVM <sup>M</sup> I <sup>M</sup> GLPGAGK(T) | 95%                        | 3.07                | 0.29                   | 2.55                   | 2   | Carbamidomethyl (+57), Oxidation (+16), Oxidation (+16) | 868.94       | 1,735.86            | 2      | 0.025 | 14   | 469   | 484  |
| (R)LQAALDNEAGGRPAMEPGNGSLDL                                    | 95%                        | 3.01                | 0.25                   | 1.09                   | 2   | Oxidation (+16)                                         | 1,499.00     | 2,995.98            | 2      | 0.58  | 190  | 38    | 68   |
